# Supplementary material for: Psychometric evaluation and reference values for the German Postconcussion Symptom Inventory (PCSI-SR8) in children aged 8–12 years
Source: PubMed Central journal article supplement (PMC10693295; doi:10.3389/fneur.2023.166828), 2023-11-17
Supplement: Data_Sheet_1.pdf [file Data_Sheet_1.pdf]

*Supplementary Material*

**Psychometric Evaluation and Reference Values for the German  
Postconcussion Symptom Inventory (PCSI-SR8) in Children Aged 8–12  
Years**

## 1 Supplementary Tables

**Supplementary Table S1.** Response patterns of the PCSI-SR8 in the TBI sample (stratified by injury severity) and in the general population sample as well as in the original English language study.

| Scale                | Item                | Response category | TBI sample (N=132) | mild (n = 95) | moderate (n = 11) | severe (n = 26) | General population sample (N = 1047) | Original English version <sup>1</sup> (N = 264) |
|----------------------|---------------------|-------------------|--------------------|---------------|-------------------|-----------------|--------------------------------------|-------------------------------------------------|
| Physical             | Headache            | No                | 80 (60.6%)         | 59 (62.1%)    | 7 (63.6%)         | 14 (53.8%)      | 694 (34.8%)                          | 32%                                             |
|                      |                     | A Little          | 44 (33.3%)         | 30 (31.6%)    | 4 (36.4%)         | 10 (38.5%)      | 323 (16.2%)                          | 39%                                             |
|                      |                     | A Lot             | 8 (6.1%)           | 6 (6.3%)      | 0 (0%)            | 2 (7.7%)        | 30 (1.5%)                            | 28%                                             |
|                      | Nausea              | No                | 104 (78.8%)        | 72 (75.8%)    | 9 (81.8%)         | 23 (88.5%)      | 856 (42.9%)                          | 60%                                             |
|                      |                     | A Little          | 20 (15.2%)         | 16 (16.8%)    | 1 (9.1%)          | 3 (11.5%)       | 171 (8.6%)                           | 30%                                             |
|                      |                     | A Lot             | 8 (6.1%)           | 7 (7.4%)      | 1 (9.1%)          | 0 (0%)          | 20 (1.0%)                            | 10%                                             |
|                      | Balance problems    | No                | 111 (84.1%)        | 82 (86.3%)    | 8 (72.7%)         | 21 (80.8%)      | 942 (47.2%)                          | 64%                                             |
|                      |                     | A Little          | 16 (12.1%)         | 10 (10.5%)    | 3 (27.3%)         | 3 (11.5%)       | 91 (4.6%)                            | 28%                                             |
|                      |                     | A Lot             | 5 (3.8%)           | 3 (3.2%)      | 0 (0%)            | 2 (7.7%)        | 14 (0.7%)                            | 8%                                              |
|                      | Dizziness           | No                | 107 (81.1%)        | 78 (82.1%)    | 9 (81.8%)         | 20 (76.9%)      | 934 (46.8%)                          | 53%                                             |
|                      |                     | A Little          | 23 (17.4%)         | 15 (15.8%)    | 2 (18.2%)         | 6 (23.1%)       | 94 (4.7%)                            | 37%                                             |
|                      |                     | A Lot             | 2 (1.5%)           | 2 (2.1%)      | 0 (0%)            | 0 (0%)          | 19 (1.0%)                            | 10%                                             |
|                      | Blurred vision      | No                | 112 (84.8%)        | 80 (84.2%)    | 9 (81.8%)         | 23 (88.5%)      | 954 (47.8%)                          | 80%                                             |
|                      |                     | A Little          | 17 (12.9%)         | 12 (12.6%)    | 2 (18.2%)         | 3 (11.5%)       | 82 (4.1%)                            | 18%                                             |
|                      |                     | A Lot             | 3 (2.3%)           | 3 (3.2%)      | 0 (0%)            | 0 (0%)          | 11 (0.6%)                            | 2%                                              |
|                      | Feeling slowed down | No                | 113 (85.6%)        | 82 (86.3%)    | 10 (90.9%)        | 21 (80.8%)      | 924 (46.3%)                          | 62%                                             |
|                      |                     | A Little          | 17 (12.9%)         | 12 (12.6%)    | 1 (9.1%)          | 4 (15.4%)       | 116 (5.8%)                           | 30%                                             |
|                      |                     | A Lot             | 2 (1.5%)           | 1 (1.1%)      | 0 (0%)            | 1 (3.8%)        | 7 (0.4%)                             | 8%                                              |
| Sensitivity to light | No                  | 102 (77.3%)       | 78 (82.1%)         | 8 (72.7%)     | 16 (61.5%)        | 859 (43.0%)     | 63%                                  |                                                 |
|                      | A Little            | 27 (20.5%)        | 14 (14.7%)         | 3 (27.3%)     | 10 (38.5%)        | 163 (8.2%)      | 28%                                  |                                                 |
|                      | A Lot               | 3 (2.3%)          | 3 (3.2%)           | 0 (0%)        | 0 (0%)            | 25 (1.3%)       | 10%                                  |                                                 |
| Sensitivity to noise | No                  | 95 (72.0%)        | 71 (74.7%)         | 7 (63.6%)     | 17 (65.4%)        | 814 (40.8%)     | 66%                                  |                                                 |
|                      | A Little            | 31 (23.5%)        | 20 (21.1%)         | 4 (36.4%)     | 7 (26.9%)         | 194 (9.7%)      | 24%                                  |                                                 |
|                      | A Lot               | 6 (4.5%)          | 4 (4.2%)           | 0 (0%)        | 2 (7.7%)          | 39 (2.0%)       | 9%                                   |                                                 |
| Emotional            | Irritability        | No                | 65 (49.2%)         | 48 (50.5%)    | 3 (27.3%)         | 14 (53.8%)      | 529 (26.5%)                          | 57%                                             |
|                      |                     | A Little          | 61 (46.2%)         | 43 (45.3%)    | 7 (63.6%)         | 11 (42.3%)      | 462 (23.1%)                          | 33%                                             |
|                      |                     | A Lot             | 6 (4.5%)           | 4 (4.2%)      | 1 (9.1%)          | 1 (3.8%)        | 56 (2.8%)                            | 10%                                             |
|                      | Sadness             | No                | 88 (66.7%)         | 68 (71.6%)    | 4 (36.4%)         | 16 (61.5%)      | 633 (31.7%)                          | 74%                                             |

| Scale            | Item                               | Response category | TBI sample (N=132) | mild (n = 95) | moderate (n = 11) | severe (n = 26) | General population sample (N = 1047) | Original English version <sup>1</sup> (N = 264) |
|------------------|------------------------------------|-------------------|--------------------|---------------|-------------------|-----------------|--------------------------------------|-------------------------------------------------|
|                  |                                    | A Little          | 37 (28.0%)         | 23 (24.2%)    | 6 (54.5%)         | 8 (30.8%)       | 384 (19.2%)                          | 18%                                             |
|                  |                                    | A Lot             | 7 (5.3%)           | 4 (4.2%)      | 1 (9.1%)          | 2 (7.7%)        | 30 (1.5%)                            | 8%                                              |
|                  |                                    | No                | 95 (72.0%)         | 70 (73.7%)    | 8 (72.7%)         | 17 (65.4%)      | 747 (37.4%)                          | 63%                                             |
|                  | <b>Nervousness</b>                 | A Little          | 30 (22.7%)         | 20 (21.1%)    | 2 (18.2%)         | 8 (30.8%)       | 272 (13.6%)                          | 31%                                             |
|                  |                                    | A Lot             | 7 (5.3%)           | 5 (5.3%)      | 1 (9.1%)          | 1 (3.8%)        | 28 (1.4%)                            | 6%                                              |
|                  |                                    | No                | 100 (75.8%)        | 75 (78.9%)    | 8 (72.7%)         | 17 (65.4%)      | 808 (40.5%)                          | 57%                                             |
| <b>Cognitive</b> | <b>Difficulty thinking clearly</b> | A Little          | 28 (21.2%)         | 17 (17.9%)    | 3 (27.3%)         | 8 (30.8%)       | 215 (10.8%)                          | 31%                                             |
|                  |                                    | A Lot             | 4 (3.0%)           | 3 (3.2%)      | 0 (0%)            | 1 (3.8%)        | 24 (1.2%)                            | 12%                                             |
|                  |                                    | No                | 86 (65.2%)         | 66 (69.5%)    | 5 (45.5%)         | 15 (57.7%)      | 640 (32.0%)                          | 52%                                             |
|                  | <b>Difficulty concentrating</b>    | A Little          | 41 (31.1%)         | 27 (28.4%)    | 4 (36.4%)         | 10 (38.5%)      | 358 (17.9%)                          | 36%                                             |
|                  |                                    | A Lot             | 5 (3.8%)           | 2 (2.1%)      | 2 (18.2%)         | 1 (3.8%)        | 49 (2.5%)                            | 13%                                             |
|                  |                                    | No                | 91 (68.9%)         | 70 (73.7%)    | 7 (63.6%)         | 14 (53.8%)      | 802 (40.2%)                          | 46%                                             |
|                  | <b>Difficulty remembering</b>      | A Little          | 37 (28.0%)         | 25 (26.3%)    | 3 (27.3%)         | 9 (34.6%)       | 217 (10.9%)                          | 43%                                             |
|                  |                                    | A Lot             | 4 (3.0%)           | 0 (0%)        | 1 (9.1%)          | 3 (11.5%)       | 28 (1.4%)                            | 11%                                             |
|                  |                                    | No                | 108 (81.8%)        | 80 (84.2%)    | 9 (81.8%)         | 19 (73.1%)      | 873 (43.7%)                          | 56%                                             |
|                  | <b>Thinking more slowly</b>        | A Little          | 18 (13.6%)         | 12 (12.6%)    | 1 (9.1%)          | 5 (19.2%)       | 154 (7.7%)                           | 32%                                             |
|                  |                                    | A Lot             | 6 (4.5%)           | 3 (3.2%)      | 1 (9.1%)          | 2 (7.7%)        | 20 (1.0%)                            | 11%                                             |
|                  |                                    | No                | 100 (75.8%)        | 73 (76.8%)    | 7 (63.6%)         | 20 (76.9%)      | 754 (37.8%)                          | 34%                                             |
| <b>Fatigue</b>   | <b>Fatigue</b>                     | A Little          | 25 (18.9%)         | 16 (16.8%)    | 3 (27.3%)         | 6 (23.1%)       | 262 (13.1%)                          | 42%                                             |
|                  |                                    | A Lot             | 7 (5.3%)           | 6 (6.3%)      | 1 (9.1%)          | 0 (0%)          | 31 (1.6%)                            | 23%                                             |
|                  |                                    | No                | 107 (81.1%)        | 76 (80.0%)    | 10 (90.9%)        | 21 (80.8%)      | 886 (44.4%)                          | 43%                                             |
|                  | <b>Drowsiness</b>                  | A Little          | 19 (14.4%)         | 14 (14.7%)    | 0 (0%)            | 5 (19.2%)       | 143 (7.2%)                           | 40%                                             |
|                  |                                    | A Lot             | 6 (4.5%)           | 5 (5.3%)      | 1 (9.1%)          | 0 (0%)          | 18 (0.9%)                            | 17%                                             |
|                  |                                    | No                | 107 (81.1%)        | 76 (80.0%)    | 10 (90.9%)        | 21 (80.8%)      | 886 (44.4%)                          | 43%                                             |

<sup>1</sup> Values obtained from the original validation study by Sady et al. (2014). According to Sady et al. (2014), values do not always add up to 100% due to rounding. Therefore, no additional absolute frequencies were calculated.

Note. N = sample frequencies, n = subgroup frequencies.

**Supplementary Table S2.** Results of negative binomial regressions with second order interactions.

|             | Variable                          | Reference Group                              | Estimate | S.E. | z     | p            |
|-------------|-----------------------------------|----------------------------------------------|----------|------|-------|--------------|
| Total score | (Intercept)                       | -                                            | 1.46     | 0.74 | 1.97  | 0.049        |
|             | Age                               | -                                            | 0.05     | 0.08 | 0.69  | 0.492        |
|             | Male                              | Female                                       | 0.11     | 0.53 | 0.21  | 0.836        |
|             | No chronic health complaints      | At least one chronic health complaint        | 0.23     | 0.74 | 0.31  | 0.759        |
|             | Age*Male                          | Age*Female                                   | -0.01    | 0.05 | -0.23 | 0.819        |
|             | Age*No chronic health complaints  | Age*At least one chronic health complaint    | -0.07    | 0.08 | -0.99 | 0.323        |
|             | Male*No chronic health complaints | Female*At least one chronic health complaint | -0.13    | 0.21 | -0.60 | 0.549        |
| Physical    | (Intercept)                       | -                                            | 1.11     | 1.00 | 1.10  | 0.271        |
|             | Age                               | -                                            | -0.03    | 0.10 | -0.25 | 0.799        |
|             | Male                              | Female                                       | -0.40    | 0.73 | -0.55 | 0.580        |
|             | No chronic health complaints      | At least one chronic health complaint        | -0.28    | 1.01 | -0.28 | 0.779        |
|             | Age*Male                          | Age*Female                                   | 0.05     | 0.07 | 0.71  | 0.480        |
|             | Age*No chronic health complaints  | Age*At least one chronic health complaint    | -0.02    | 0.10 | -0.17 | 0.865        |
|             | Male*No chronic health complaints | Female*At least one chronic health complaint | -0.25    | 0.29 | -0.85 | 0.396        |
| Emotional   | (Intercept)                       | -                                            | -0.43    | 0.61 | -0.70 | 0.484        |
|             | Age                               | -                                            | 0.11     | 0.06 | 1.71  | 0.088        |
|             | Male                              | Female                                       | 0.11     | 0.47 | 0.23  | 0.815        |
|             | No chronic health complaints      | At least one chronic health complaint        | 1.09     | 0.62 | 1.77  | 0.077        |
|             | Age*Male                          | Age*Female                                   | -0.02    | 0.04 | -0.36 | 0.718        |
|             | Age*No chronic health complaints  | Age*At least one chronic health complaint    | -0.14    | 0.06 | -2.34 | <b>0.019</b> |
|             | Male*No chronic health complaints | Female*At least one chronic health complaint | -0.10    | 0.18 | -0.60 | 0.552        |
| Cognitive   | (Intercept)                       | -                                            | -0.03    | 0.88 | -0.04 | 0.968        |
|             | Age                               | -                                            | 0.08     | 0.09 | 0.92  | 0.356        |
|             | Male                              | Female                                       | 0.56     | 0.67 | 0.84  | 0.402        |
|             | No chronic health complaints      | At least one chronic health complaint        | 0.16     | 0.89 | 0.18  | 0.857        |
|             | Age*Male                          | Age*Female                                   | -0.06    | 0.06 | -0.91 | 0.365        |
|             | Age*No chronic health complaints  | Age*At least one chronic health complaint    | -0.09    | 0.09 | -1.01 | 0.313        |
|             | Male*No chronic health complaints | Female*At least one chronic health complaint | -0.09    | 0.26 | -0.36 | 0.722        |
| Fatigue     | (Intercept)                       | -                                            | -1.03    | 1.11 | -0.93 | 0.355        |
|             | Age                               | -                                            | 0.08     | 0.11 | 0.71  | 0.478        |

| <b>Variable</b>                   | <b>Reference Group</b>                       | <b>Estimate</b> | <b>S.E.</b> | <b>z</b> | <b>p</b> |
|-----------------------------------|----------------------------------------------|-----------------|-------------|----------|----------|
| Male                              | Female                                       | 0.85            | 0.84        | 1.01     | 0.314    |
| No chronic health complaints      | At least one chronic health complaint        | -0.40           | 1.13        | -0.36    | 0.720    |
| Age*Male                          | Age*Female                                   | -0.10           | 0.08        | -1.29    | 0.197    |
| Age*No chronic health complaints  | Age*At least one chronic health complaint    | -0.01           | 0.11        | -0.13    | 0.898    |
| Male*No chronic health complaints | Female*At least one chronic health complaint | 0.14            | 0.32        | 0.44     | 0.659    |

*Note.* \*: interaction between the variables; Estimate: regression coefficient; S.E.: standard error; z: z-value; p: p-value; values in **bold** are significant at 5%, but not at 1.25% (adjusted significance level after Bonferroni correction:  $\alpha_{adj} = 0.05/4 = 0.0125$ ).
